# Supplementary material
Source: PubMed Central journal article supplement (PMC7644657)
Supplement: NIHMS1617366-supplement-1.pdf [file NIHMS1617366-supplement-1.pdf]

**a**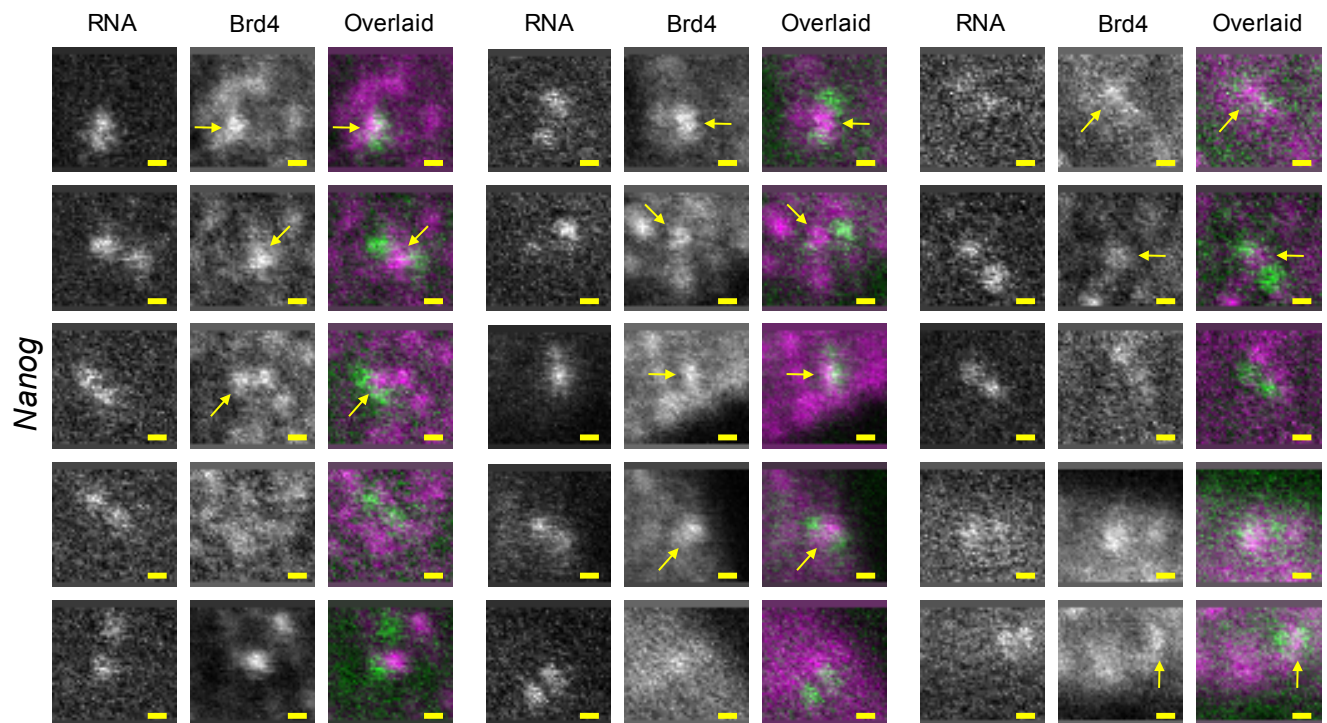**b**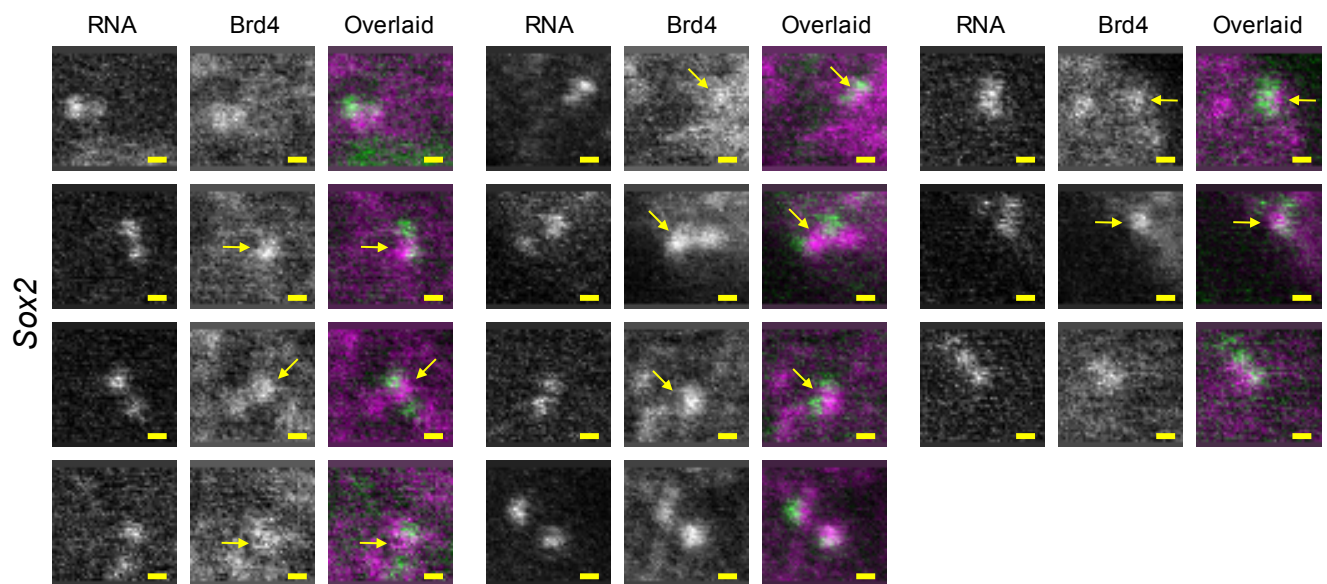

**Supplementary Figure 1. Brd4 clustering at doublet transcription sites.** Transcription sites are visualized by tagging the nascent RNA with MCP-mNeonGreen. SNAP-Brd4 is visualized by labeling with SiR dye. (a) *Nanog*; (b) *Sox2*. Yellow arrows indicate doublets where Brd4 clusters reside between the two transcription sites. Scale bars: 300nm.
